# Supplementary material for: Neurovascular dysfunction in GRN-associated frontotemporal dementia identified by single-nucleus RNA sequencing of human cerebral cortex
Source: Springer Nature journal article supplement (doi:10.1038/s41593-022-01124-3), 2022-07-25
Supplement: 41593_2022_1124_MOESM1_ESM.pdf [file 41593_2022_1124_MOESM1_ESM.pdf]

---

**Supplementary information**

---

**Neurovascular dysfunction in GRN-associated frontotemporal dementia identified by single-nucleus RNA sequencing of human cerebral cortex**

---

In the format provided by the authors and unedited

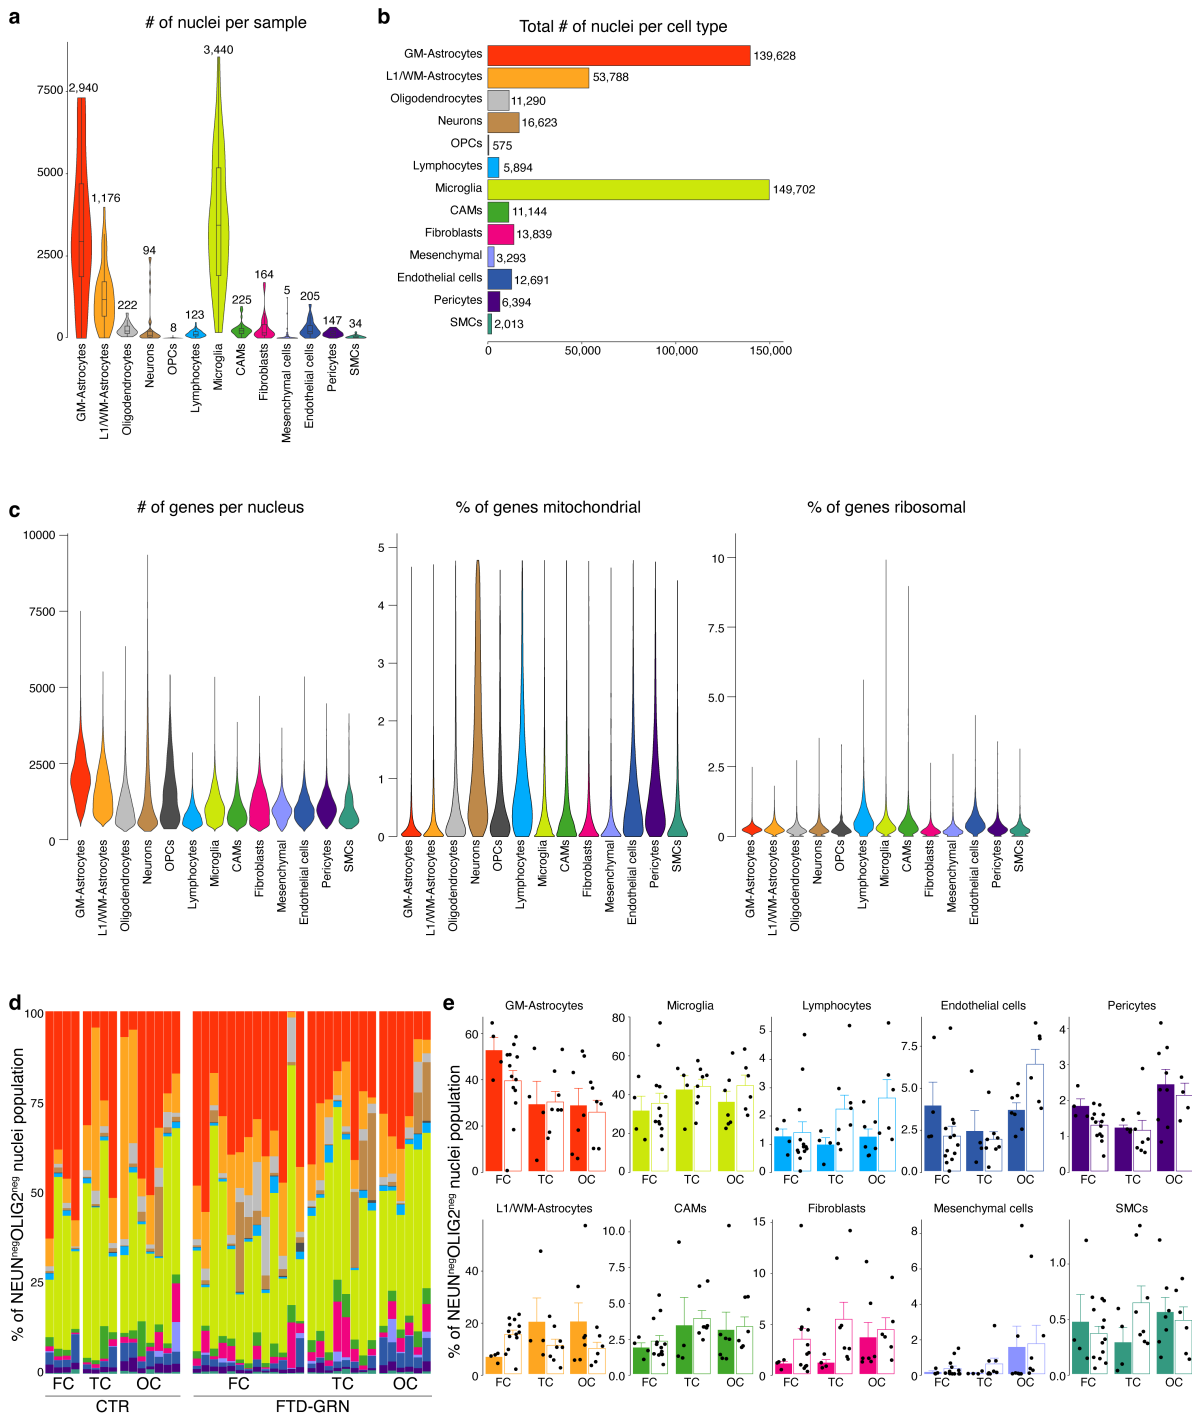

### Supplementary Figure 1. snRNAseq quality control

Violin plots with box plots depicting the number of nuclei per cell type obtained per sample. Median is indicated above the violins. (b) Barplots depicting the total number of nuclei obtained per cell type across 23 samples. (c) Violin plots depicting the number of detected genes per nucleus, fraction of mitochondrial genes per nucleus and fraction of ribosomal distribution per sample. Color labeling is the same as in Figure 2a (depicting cell type clusters). (e) Barplots depicting relative cell type abundance per group. Black dots are individual samples. Bars depict mean, error bars depict standard error.

Abbreviations: CTR = Control; FTD = Frontotemporal Dementia; FC = Frontal Cortex; TC = Temporal Cortex; OC = Occipital Cortex; CAM = CNS-associated Macrophages; SMC = Smooth Muscle Cell; OPC = Oligodendrocyte Progenitor Cell; GM = Grey Matter; WM = White Matter; L1 = Layer 1.

**The NeuroCEB Neuropathology network includes:**

Franck Letournel (CHU Angers)  
Marie-Laure Martin-Négrier (CHU Bordeaux) Maxime  
Faisant (CHU Caen)  
Catherine Godfraind (CHU Clermont-Ferrand) Claude-  
Alain Maurage (CHU Lille)  
Vincent Deramecourt (CHU Lille)  
David Meyronet (CHU Lyon)  
André Maues de Paula (CHU Marseille)  
Valérie Rigau (CHU Montpellier)  
Fanny Vandembos-Burel (CHU Nice)  
Danielle Seilhean (CHU Pitié-Salpêtrière, Paris) Susana  
Boluda (CHU Pitié-Salpêtrière, Paris) Isabelle Plu (CHU  
Pitié-Salpêtrière, Paris)  
Dan Christian Chiforeanu (CHU Rennes)  
Florent Marguet (CHU Rouen)  
Béatrice Lannes (CHU Strasbourg)
